# Supplementary material for: AHL-lactonase expression in three marine emerging pathogenic Vibrio spp. reduces virulence and mortality in brine shrimp (Artemia salina) and Manila clam (Venerupis philippinarum)
Source: PubMed Central journal article supplement (PMC5903640; doi:10.1371/journal.pone.0195176), 2018-04-17
Supplement: pone.0195176.s005.pdf [file pone.0195176.s005.pdf]

**Table S1.** Chromatographic profiles used in the HPLC/FT-HRMS FS and SIM mode analyses.

| Mode             | Step | Time (min) | % CH <sub>3</sub> CN (0.1% formic acid) | % H <sub>2</sub> O (0.1% formic acid) |
|------------------|------|------------|-----------------------------------------|---------------------------------------|
| FS <sup>a</sup>  | 1    | 0          | 30                                      | 70                                    |
|                  | 2    | 5          | 80                                      | 20                                    |
|                  | 3    | 7          | 95                                      | 5                                     |
|                  | 4    | 12         | 95                                      | 5                                     |
|                  | 5    | 13         | 30                                      | 70                                    |
|                  | 6    | 16         | 30                                      | 70                                    |
|                  | 7    | 18         | 90                                      | 10                                    |
| SIM <sup>b</sup> | 1    | 0          | 0                                       | 100                                   |
|                  | 2    | 1          | 0                                       | 100                                   |
|                  | 3    | 1.5        | 50                                      | 50                                    |
|                  | 4    | 5.5        | 90                                      | 10                                    |
|                  | 5    | 8          | 99                                      | 1                                     |
|                  | 6    | 13         | 99                                      | 1                                     |
|                  | 7    | 13.2       | 0                                       | 100                                   |
|                  | 8    | 18         | 0                                       | 100                                   |

<sup>a</sup>Flow rate of 80  $\mu$ L/min.<sup>b</sup>Flow rate of 350  $\mu$ L/min.
