# Supplementary material for: AHL-lactonase expression in three marine emerging pathogenic Vibrio spp. reduces virulence and mortality in brine shrimp (Artemia salina) and Manila clam (Venerupis philippinarum)
Source: PubMed Central journal article supplement (PMC5903640; doi:10.1371/journal.pone.0195176), 2018-04-17
Supplement: pone.0195176.s006.pdf [file pone.0195176.s006.pdf]

**Table S2.** Data used to calculate the AHL concentration in each *Vibrio* strain by HPLC/FT-HRMS SIM mode analysis. Numbers are counts in the mass spectra.

| AHL concentration (ng/mL) | C4-HSL <sup>a</sup> | C6-HSL         | C8-HSL   | C12-HSL   | C16-HSL | 3-O-C10-HSL | 3-O-C12-HSL | 3-O-C13-HSL | 3-OH-C10-HSL | 3-OH-C12-HSL | 3-OH-C13-HSL | 3-OH-C14-HSL |
|---------------------------|---------------------|----------------|----------|-----------|---------|-------------|-------------|-------------|--------------|--------------|--------------|--------------|
| 0.4                       | 16536               | - <sup>b</sup> | -        | -         | -       | 6005        | 3952        | 7699        | 18541        | 15989        | 5414         | 33127        |
| 4.0                       | 23347               | -              | -        | -         | -       | 188155      | 172283      | 155736      | 286136       | 192380       | 174672       | 225254       |
| 20.0                      | 83460               | -              | -        | -         | -       | 927377      | 1068419     | 854272      | 1361511      | 926104       | 890182       | 1253045      |
| 37.5                      | -                   | 722787         | 1675846  | 7372036   | -       | -           | -           | -           | -            | -            | -            | -            |
| 75.0                      | 287128              | 1764720        | 3763713  | 15162081  | 52376   | 3332762     | 3562948     | 2663970     | 5212194      | 3520142      | 3070748      | 4141870      |
| 150.0                     | 560013              | 3220846        | 6370386  | 29729334  | -       | 6830983     | 7992041     | 6861302     | 10042822     | 6882957      | 6944537      | 7962442      |
| 300.0                     | 1139650             | 7695713        | 14674226 | 56614581  | -       | 12966093    | 15158010    | 12917475    | 17304998     | 13116674     | 12983242     | 14718011     |
| 500.0                     | 1831893             | -              | -        | -         | 112751  | 20978191    | 23821804    | 20488901    | 25799960     | 20912686     | 21747024     | 23458510     |
| 750.0                     | -                   | 14289711       | 24277824 | 102489159 | -       | -           | -           | -           | -            | -            | -            | -            |
| 800.0                     | 3044747             | -              | -        | -         | 125248  | 31351451    | 36952643    | 31346502    | 40525788     | 33247003     | 34819034     | 40391010     |
| 1000.0                    | -                   | 18220568       | 33089439 | 135380554 | -       | -           | -           | -           | -            | -            | -            | -            |

**Linear fitting for each standard**

| AHL standard | Calibration curve            | Adjusted R-squared |
|--------------|------------------------------|--------------------|
| C4-HSL       | $y = 3762.05x + 3653.52$     | $R^2 = 0.9994$     |
| C6-HSL       | $y = 17948.66x + 734677.94$  | $R^2 = 0.9839$     |
| C8-HSL       | $y = 31214.48x + 1.94466E6$  | $R^2 = 0.9763$     |
| C12-HSL      | $y = 128310.81x + 8.33816E6$ | $R^2 = 0.9860$     |
| C16-HSL      | $y = 108.40x + 42415.45$     | $R^2 = 0.9580$     |
| 3-O-C10-HSL  | $y = 39673.20x + 401173.9$   | $R^2 = 0.9972$     |
| 3-O-C12-HSL  | $y = 46463.99x + 350199.5$   | $R^2 = 0.9982$     |
| 3-O-C13-HSL  | $y = 39650.32x + 245819.0$   | $R^2 = 0.9973$     |
| 3-OH-C10-HSL | $y = 50245.13x + 953573.8$   | $R^2 = 0.9946$     |
| 3-OH-C12-HSL | $y = 41453.76x + 268668.7$   | $R^2 = 0.9994$     |
| 3-OH-C13-HSL | $y = 43499.44x + 23373.51$   | $R^2 = 0.9998$     |
| 3-OH-C14-HSL | $y = 49359.17x + 112302.0$   | $R^2 = 0.9977$     |

<sup>a</sup>Columns indicate area peak of the analyte

<sup>b</sup>Missing area peaks indicate that this concentration was not used during calibration process
